# Supplementary material
Source: PubMed Central journal article supplement (PMC6369661)
Supplement: cs8b03430_si_001.pdf [file cs8b03430_si_001.pdf]

**Supporting Information**

**Selective production of biobased phenol**

**from lignocellulose-derived alkylmethoxyphenols**

Xiaoming Huang,<sup>[a]</sup> Jasper M. Ludenhoff,<sup>[a]</sup> Mike Dirks,<sup>[a]</sup> Xianhong Ouyang,<sup>[a]</sup> Michael D. Boot,<sup>[b]</sup> Emiel J.  
M. Hensen\*<sup>[a]</sup>

<sup>a</sup> *Schuit Institute of Catalysis, Inorganic Materials Chemistry, Eindhoven University of Technology, P.O. Box 513, 5600 MB Eindhoven, The Netherlands.*

<sup>b</sup> *Combustion Technology, Department of Mechanical Engineering, Eindhoven University of Technology, P.O. Box 513, 5600 MB Eindhoven, The Netherlands.*

\* Correspondence to: [e.j.m.hensen@tue.nl](mailto:e.j.m.hensen@tue.nl)

## 1. Extended results

### 1.1. TG analysis of the spent zeolite catalysts

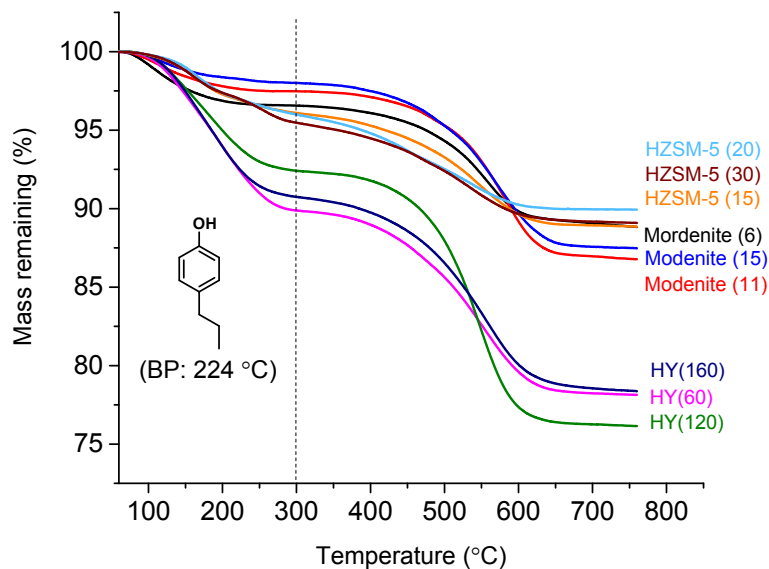

**Figure S1.** TG analysis of spent catalysts (the catalyst was washed with acetone and dried before measurement).

| Catalyst  | Si/Al ratio | Weight loss (%) (300-700 °C) |
|-----------|-------------|------------------------------|
| HZSM-5    | 15          | 7.1                          |
| HZSM-5    | 20          | 6.0                          |
| HZSM-5    | 30          | 6.3                          |
| Mordenite | 6           | 7.7                          |
| Mordenite | 11          | 10.5                         |
| Mordenite | 15          | 10.8                         |
| HY        | 60          | 11.7                         |
| HY        | 120         | 16.3                         |
| HY        | 160         | 12.3                         |

## 1. 2. Effect of feedstock to benzene ratio in transalkylation

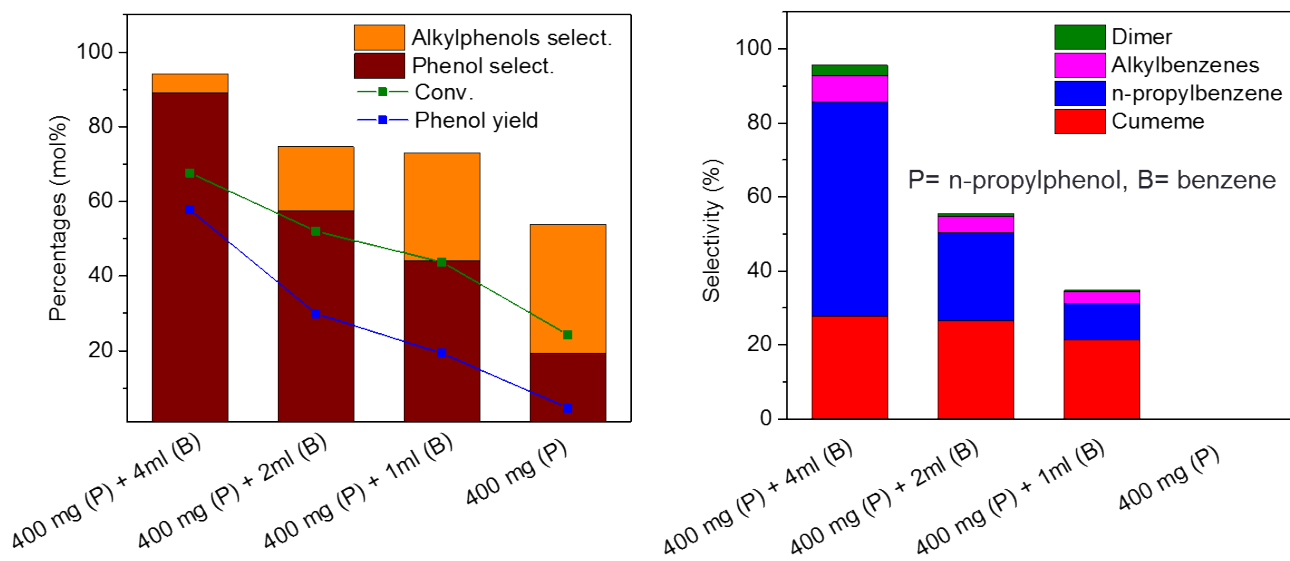

**Figure S2.** Influence of feedstock to benzene solvent ratio on product distributions over HZSM-5 (Si/Al 15) at 350°C for 2 h using a mini-batch autoclave (conditions: 400 mg 4-propylphenol, 40 mg catalyst).

### 1.3. Effect of solvent for transalkylation

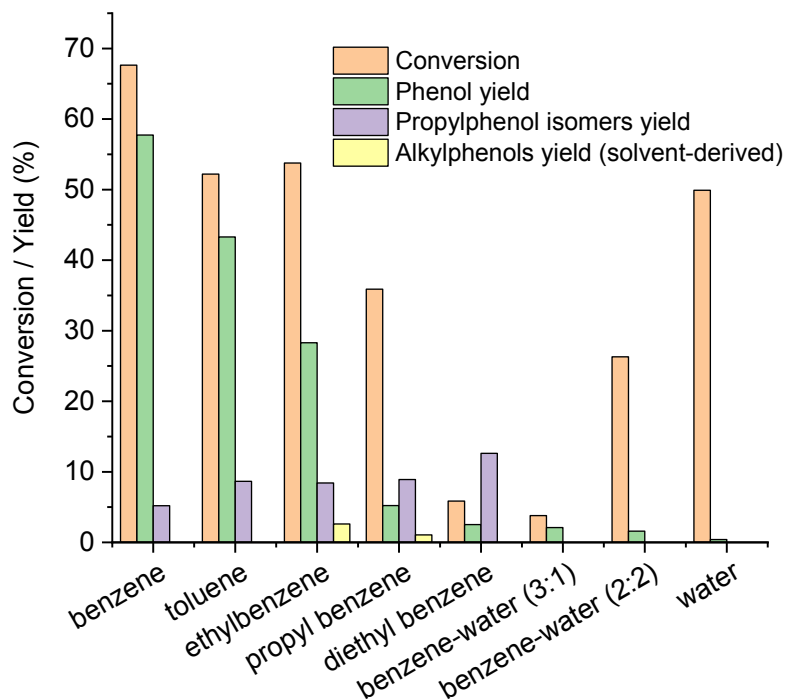

**Figure S3.** Influence of solvent on product distributions over HZSM-5 (Si/Al 15) at 350°C for 2 h using a mini-batch autoclave (conditions: 400 mg 4-propylphenol, 4 ml solvent, 40 mg catalyst).

### 1.4. Transalkylation of guaiacol and 4-propylguaiacol over HZSM-5

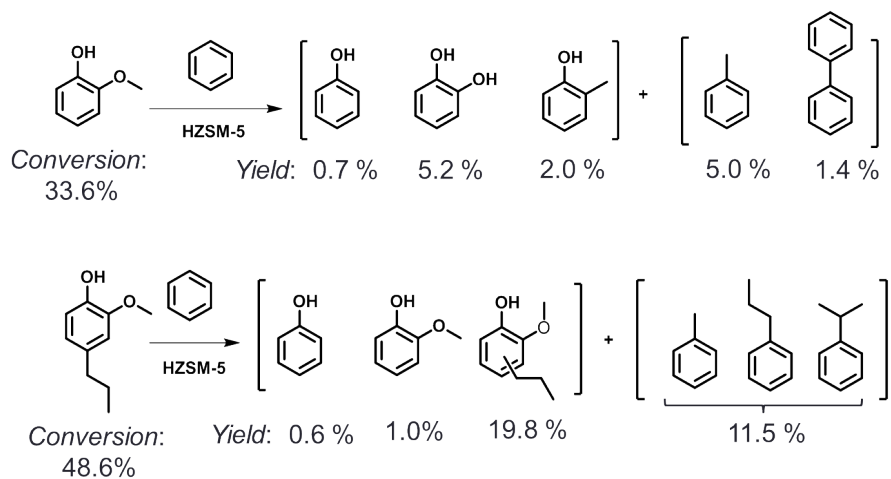

**Figure S4.** Transalkylation of guaiacol and 4-propylguaiacol over HZSM-5 (Si/Al 15) in benzene using a mini-batch autoclave (conditions: 400 mg feedstock, 4 ml benzene solvent, 40 mg catalyst, temperature 350 °C, 2h).

## 1. 5. Catalyst screening for demethoxylation

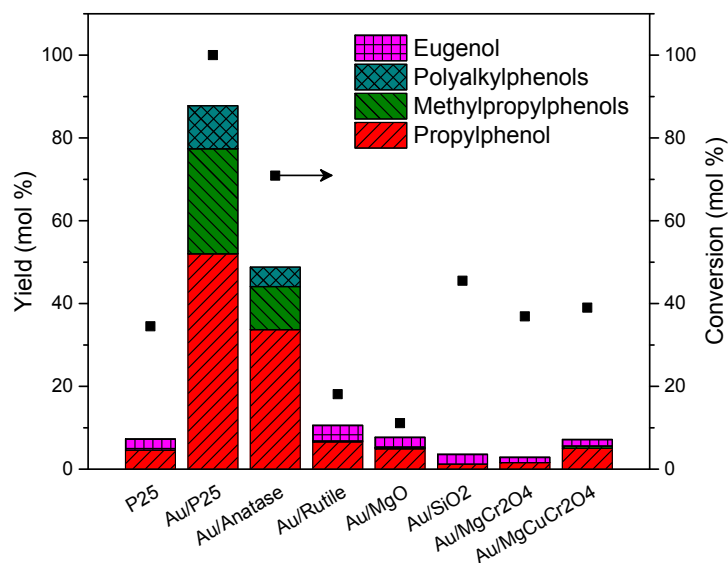

**Figure S5.** Influence of the support on the catalytic performance of supported Au nanoparticle catalysts for the demethoxylation of 4-propylguaiacol at 350°C for 2 h using a Parr batch autoclave (conditions: 3000 mg feedstock, 30 ml benzene, 100 mg catalyst, 50 bar H<sub>2</sub>, 2 h reaction time)

## 1.6. XPS analysis of the Au/TiO<sub>2</sub> catalyst

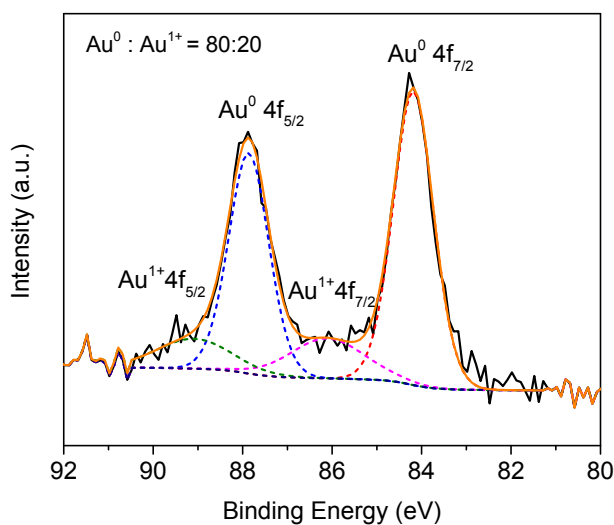

**Figure S6.** XPS spectra of Au 4f region of the calcined Au/TiO<sub>2</sub> (P25) catalyst.

The results show that after the calcination of Au/TiO<sub>2</sub> at 350°C, most of the Au nanoparticles are in the metallic form (~80%). The remainder of gold is in the 1+ oxidation state, which indicates the presence of gold oxide species.

### 1.7. Two-step demethoxylation-transalkylation

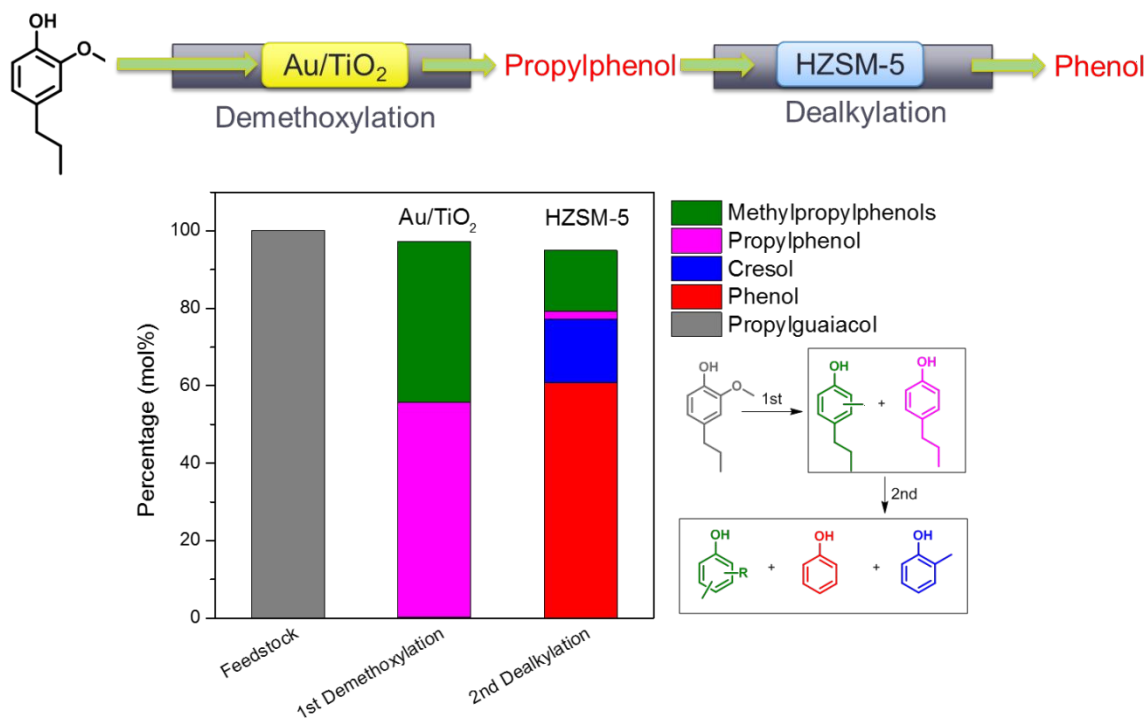

**Figure S7.** Two-step process for demethoxylation over Au/TiO<sub>2</sub> catalyst, followed by dealkylation into phenol over the HZSM-5 (Si/Al 15) in benzene using a fixed-bed reactor (conditions: 200 mg catalyst, 5 mol% feedstock in benzene, liquid feed rate 4.5 ml/h, gas feed rate 30 Nml/min H<sub>2</sub>, temperature 350 °C, pressure 100 bar; the feedstock for the second step is obtained from the first demethoxylation step).

## 1.8. Effect of temperature on one-step demethoxylation-transalkylation

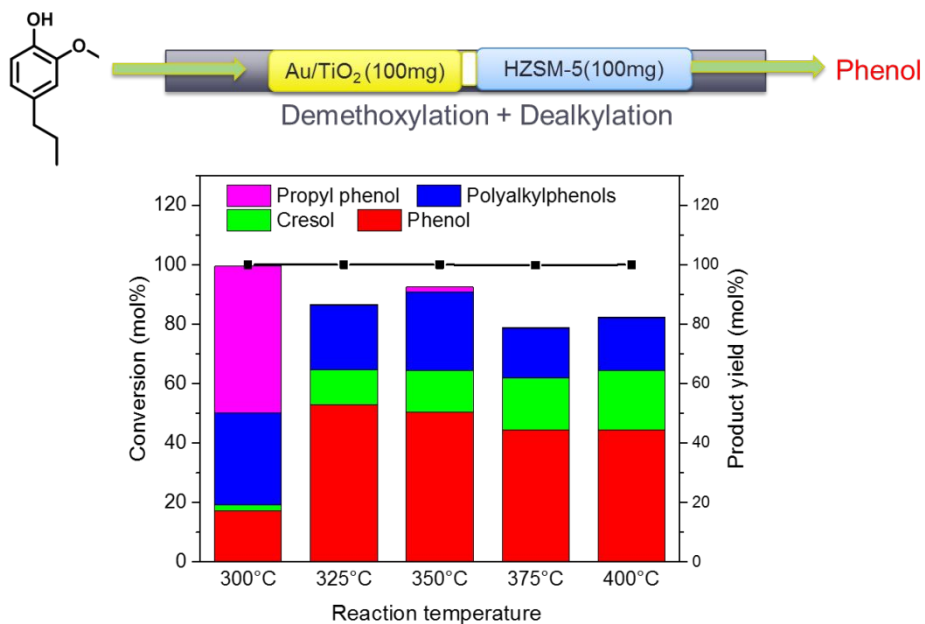

**Figure S8.** One-step process for demethoxylation and dealkylation over  $\text{Au/TiO}_2$  and HZSM-5 (Si/Al 15) catalysts in benzene using a fixed-bed reactor at different temperatures (conditions: 100 mg  $\text{Au/TiO}_2$  + 100 mg HZSM-5 catalysts, 5 mol% feedstock in benzene, liquid feed rate: 4.5 ml/h, gas feed rate 30 Nml/min  $\text{H}_2$ , pressure 100 bar, the yield are based on the averages of the 4-6 h time-on-stream).

## 1.9. Transalkylation of 4-propylphenol with benzene

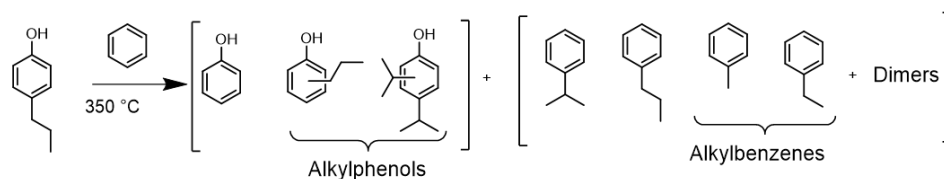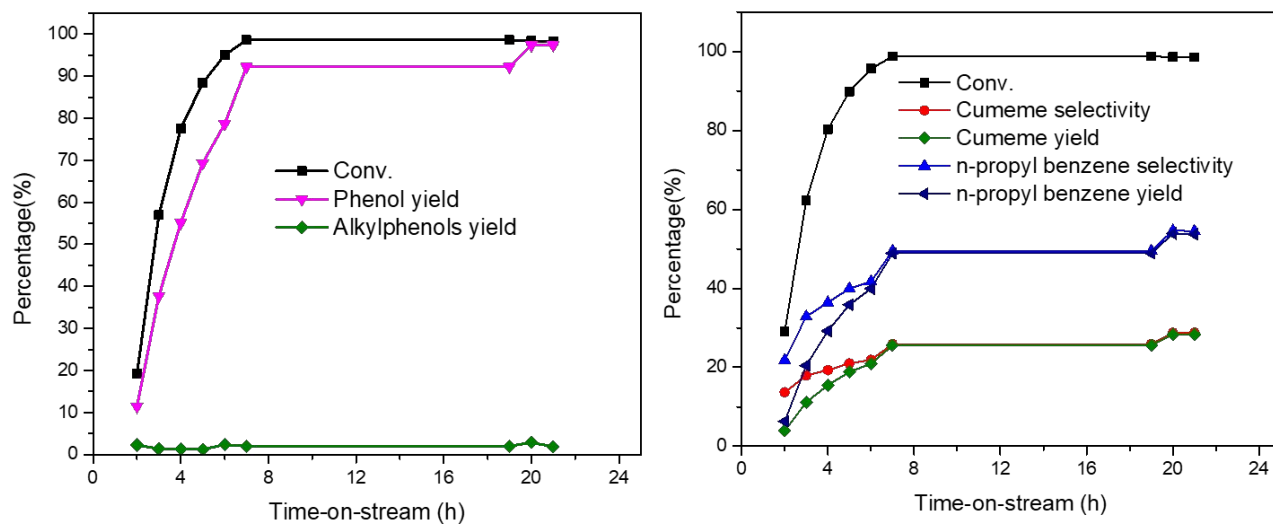

**Figure S9.** Catalytic dealkylation of 4-propylphenol into phenol over HZSM-5 (Si/Al 20) in benzene in a fixed-bed reactor (conditions: 200 mg HZSM-5, 5 mol% feedstock in benzene, liquid feed rate 2.3 ml/h, temperature 350 °C, pressure 50 bar corresponding to measured autogenous pressure of the liquid mixture).
